# Supplementary material
Source: publisher figshare collection journal article supplement (https://acs.figshare.com/ndownloader/files/3753427)
Supplement: Supplementary file 1 [file 3753427]

# Solid sampling electrothermal vaporization inductively coupled plasma optical emission spectrometry for direct determination of total oxygen in coal

Thomas Vogt<sup>\*a,b</sup>; Daniela Bauer<sup>a,b</sup>; David Nennstiel<sup>b</sup>; Matthias Otto<sup>b</sup>

<sup>a</sup> German Centre for Energy Resources, Reiche Zeche, Fuchsmuehlenweg 9, 09596 Freiberg, Germany

<sup>b</sup> Institute of Analytical Chemistry, TU Bergakademie Freiberg, Leipziger Str. 29, 09599 Freiberg, Germany

\*Corresponding author: Thomas Vogt  
TU Bergakademie Freiberg  
Institute of Analytical Chemistry  
Leipziger Str. 29  
09599 Freiberg  
Germany

E-mail address: Thomas.Vogt@chemie.tu-freiberg.de

Phone number: +49-3731-392335

Co-author E-mail addresses: Daniela.Bauer@chemie.tu-freiberg.de; david.nennstiel@googlemail.com; Matthias.Otto@chemie.tu-freiberg.de

## Supporting Information

- Table S-1. Operating conditions and line selection for ETV-ICP OES
- Table S-2. Operating conditions for oxygen analyzer
- Table S-3. Optimized Temperature profile of the ETV-furnace
- Table S-4. Optimized Temperature profile of the oxygen analyzer-furnace
- Table S-5. Obtained contents on dry basis for FNAA (literature), ETV-ICP OES and oxygen analyzer experiments, relative standard deviations (RSD's) and percent recoveries (R) of ETV-ICP OES vs. FNAA or OA vs. FNAA
- Table S-6. t-Test for ETV vs. FNAA and OA vs. FNAA and F-Test and t-Test for ETV vs. OA
- 
- Figure S-1. Overview about the sample preparation
- Figure S-2. Processing of the obtained transient data
- Figure S-3. Excerpt of the full spectra (130.5 – 130.7 nm) from the gas blank, all eight APC, NIST SRM 1632d and the calibration material calcium oxalate monohydrate
- Figure S-4. Detailed explanation of the stepwise decomposition process of calcium oxalate monohydrate by means of ETV-ICP OES – oxygen release (red line); temperature profile (black line)
- Figure S-5. Box-and-Whisker plots of recovery of oxygen from APC and NIST SRM 1632d for both analysis techniques
- Figure S-6. Box-and-Whisker plots of RSD's of oxygen from all APC and NIST SRM 1632d for both analysis techniques

Table S-1. Operating conditions for ETV-ICP OES

| Instrument | Parameter                                                                          | Value                                                                                                       |
|------------|------------------------------------------------------------------------------------|-------------------------------------------------------------------------------------------------------------|
| ETV        | Carrier gas flow rate [L · min <sup>-1</sup> ] (Ar)                                | 0.130                                                                                                       |
|            | Bypass gas flow rate [L · min <sup>-1</sup> ] (Ar)                                 | 0.400                                                                                                       |
|            | Reaction gas flow rate [L · min <sup>-1</sup> ] (CCl <sub>2</sub> F <sub>2</sub> ) | 3                                                                                                           |
| ICP OES    | Plasma RF power [W]                                                                | 1650                                                                                                        |
|            | Coolant-gas flow rate [L · min <sup>-1</sup> ] (Ar)                                | 17                                                                                                          |
|            | Auxiliary gas flow rate [L · min <sup>-1</sup> ] (Ar)                              | 1.6                                                                                                         |
|            | Inner diameter of injector tube (mm)                                               | 2.5                                                                                                         |
|            | View configuration                                                                 | axial                                                                                                       |
|            | Wavelengths [nm]                                                                   | <div> <div> O<br/>Ar<br/>Ca<br/>O </div> <div> 130.603<br/>425.118<br/>300.686<br/>12,5 - 180 </div> </div> |
|            | Integration range [s]                                                              |                                                                                                             |

Table S-2. Operating conditions for oxygen analyzer

| Parameter                                           | Value |
|-----------------------------------------------------|-------|
| Carrier gas flow rate [L · min <sup>-1</sup> ] (He) | 1.0   |
| Temperature [°C]                                    | 2400  |
| Sample mass [mg]                                    | 1-4   |

Table S-3. Temperature profile of the ETV-furnace

| Step               | Program |        |
|--------------------|---------|--------|
|                    | t [s]   | T [°C] |
| Preheating         | 5       | 100    |
|                    | 20      | 135    |
| First evaporation  | 70      | 1100   |
| Second evaporation | 25      | 2350   |
| Third evaporation  | 15      | 2400   |

Table S-4. Temperature profile of the oxygen analyzer-furnace

| Step      | Program |        |
|-----------|---------|--------|
|           | t [s]   | T [°C] |
| Purging   | 30      | 1100   |
| Heating   | 5       | 2400   |
| Pyrolysis | 65      | 2400   |

Table S-5. Obtained contents on dry basis for FNAA (literature), ETV-ICP OES and oxygen analyzer experiments, relative standard deviations (RSD's) and percent recoveries (R) of ETV-ICP OES vs. FNAA or OA vs. FNAA

| Samples | FNAA           | ETV-ICP OES vs. FNAA |            |          | Oxygen analyzer vs. FNAA |            |          |
|---------|----------------|----------------------|------------|----------|--------------------------|------------|----------|
|         | Content<br>[%] | Content<br>[%]       | RSD<br>[%] | R<br>[%] | Content<br>[%]           | RSD<br>[%] | R<br>[%] |
| POC     |                | 3.97                 | 3.34       | 94.12    | 4.24                     | 7.85       | 100.43   |
| UF      |                | 8.61                 | 1.35       | 96.46    | 8.79                     | 8.05       | 98.46    |
| PITT    |                | 10.12                | 0.50       | 92.80    | 10.53                    | 8.73       | 96.56    |
| 1632d   |                | 11.61                | 1.18       | 96.77    | 10.56                    | 7.85       | 87.96    |
| UT      |                | 11.78                | 1.31       | 94.21    | 13.26                    | 7.27       | 106.07   |
| IL      |                | 13.81                | 1.70       | 92.66    | 15.28                    | 6.09       | 102.58   |
| WV      |                | 15.36                | 2.85       | 93.11    | 15.73                    | 5.29       | 95.32    |
| WY      |                | 19.87                | 2.46       | 95.97    | 21.35                    | 3.19       | 103.15   |
| ND      |                | 22.59                | 0.37       | 96.96    | 22.92                    | 4.26       | 98.37    |

Table S-6. t-Test for ETV vs. FNAA and OA vs. FNAA with  $\alpha = 0.05$

$$t = \frac{|\bar{x} - \mu|}{s} \sqrt{n} \quad \bar{x} = \text{average content ETV/OA}; \mu = \text{content FNAA}; n = 3;$$

$$s = \text{standard deviation ETV/OA values}$$

| Samples | ETV-ICP OES vs. FNAA |       |                   | Oxygen analyzer vs. FNAA |      |                   |
|---------|----------------------|-------|-------------------|--------------------------|------|-------------------|
|         | s<br>[%]             | t     | t <sub>krit</sub> | s<br>[%]                 | t    | t <sub>krit</sub> |
| POC     | 0.1326               | 3.24  | 4.303             | 0.7078                   | 0.34 | 4.303             |
| UF      | 0.1163               | 4.71  | 4.303             | 0.9310                   | 0.71 | 4.303             |
| PITT    | 0.0507               | 26.79 | 4.303             | 0.9193                   | 0.71 | 4.303             |
| 1632d   | 0.1372               | 4.89  | 4.303             | 0.3326                   | 0.09 | 4.303             |
| UT      | 0.1546               | 8.11  | 4.303             | 0.9637                   | 1.36 | 4.303             |
| IL      | 0.2343               | 8.08  | 4.303             | 0.8314                   | 1.61 | 4.303             |
| WV      | 0.4380               | 4.50  | 4.303             | 0.9758                   | 0.67 | 4.303             |
| WY      | 0.4895               | 2.95  | 4.303             | 0.6819                   | 1.65 | 4.303             |
| ND      | 0.0843               | 14.56 | 4.303             | 0.8289                   | 3.02 | 4.303             |

F-Test and t-Test for ETV vs. OA with  $\alpha = 0.05$

$$F_{calc} = \frac{s_1^2}{s_2^2}$$

$$s_{pooled} = \sqrt{\frac{s_1^2 (n_1 - 1) + s_2^2 (n_2 - 1)}{n_1 + n_2 - 2}}$$

$$t = \frac{|\bar{x}_{ETV} - \bar{x}_{OA}|}{s_{pooled}} \cdot \sqrt{\frac{n_1 \cdot n_2}{n_1 + n_2}}$$

| Samples | ETV-ICP OES vs. OA          |                            |                   |                     |      |                   |
|---------|-----------------------------|----------------------------|-------------------|---------------------|------|-------------------|
|         | s <sub>1</sub> (ETV)<br>[%] | s <sub>2</sub> (OA)<br>[%] | F <sub>calc</sub> | s <sub>pooled</sub> | t    | t <sub>krit</sub> |
| POC     | 0.1326                      | 0.7078                     | 0.1589            | 0.2532              | 1.29 | 4.303             |
| UF      | 0.1163                      | 0.9310                     | 0.0270            | 0.5072              | 0.43 | 4.303             |
| PITT    | 0.0507                      | 0.9193                     | 0.0030            | 0.6511              | 0.77 | 4.303             |
| 1632d   | 0.1372                      | 0.3326                     | 0.0274            | 0.5941              | 2.18 | 4.303             |
| UT      | 0.1546                      | 0.9637                     | 0.0257            | 0.6902              | 2.63 | 4.303             |
| IL      | 0.2343                      | 0.8314                     | 0.0633            | 0.6789              | 2.66 | 4.303             |
| WV      | 0.4380                      | 0.9758                     | 0.2775            | 0.6645              | 0.67 | 4.303             |
| WY      | 0.4895                      | 0.6819                     | 0.5152            | 0.5935              | 3.07 | 4.303             |
| ND      | 0.0843                      | 0.8289                     | 0.0075            | 0.6925              | 0.58 | 4.303             |

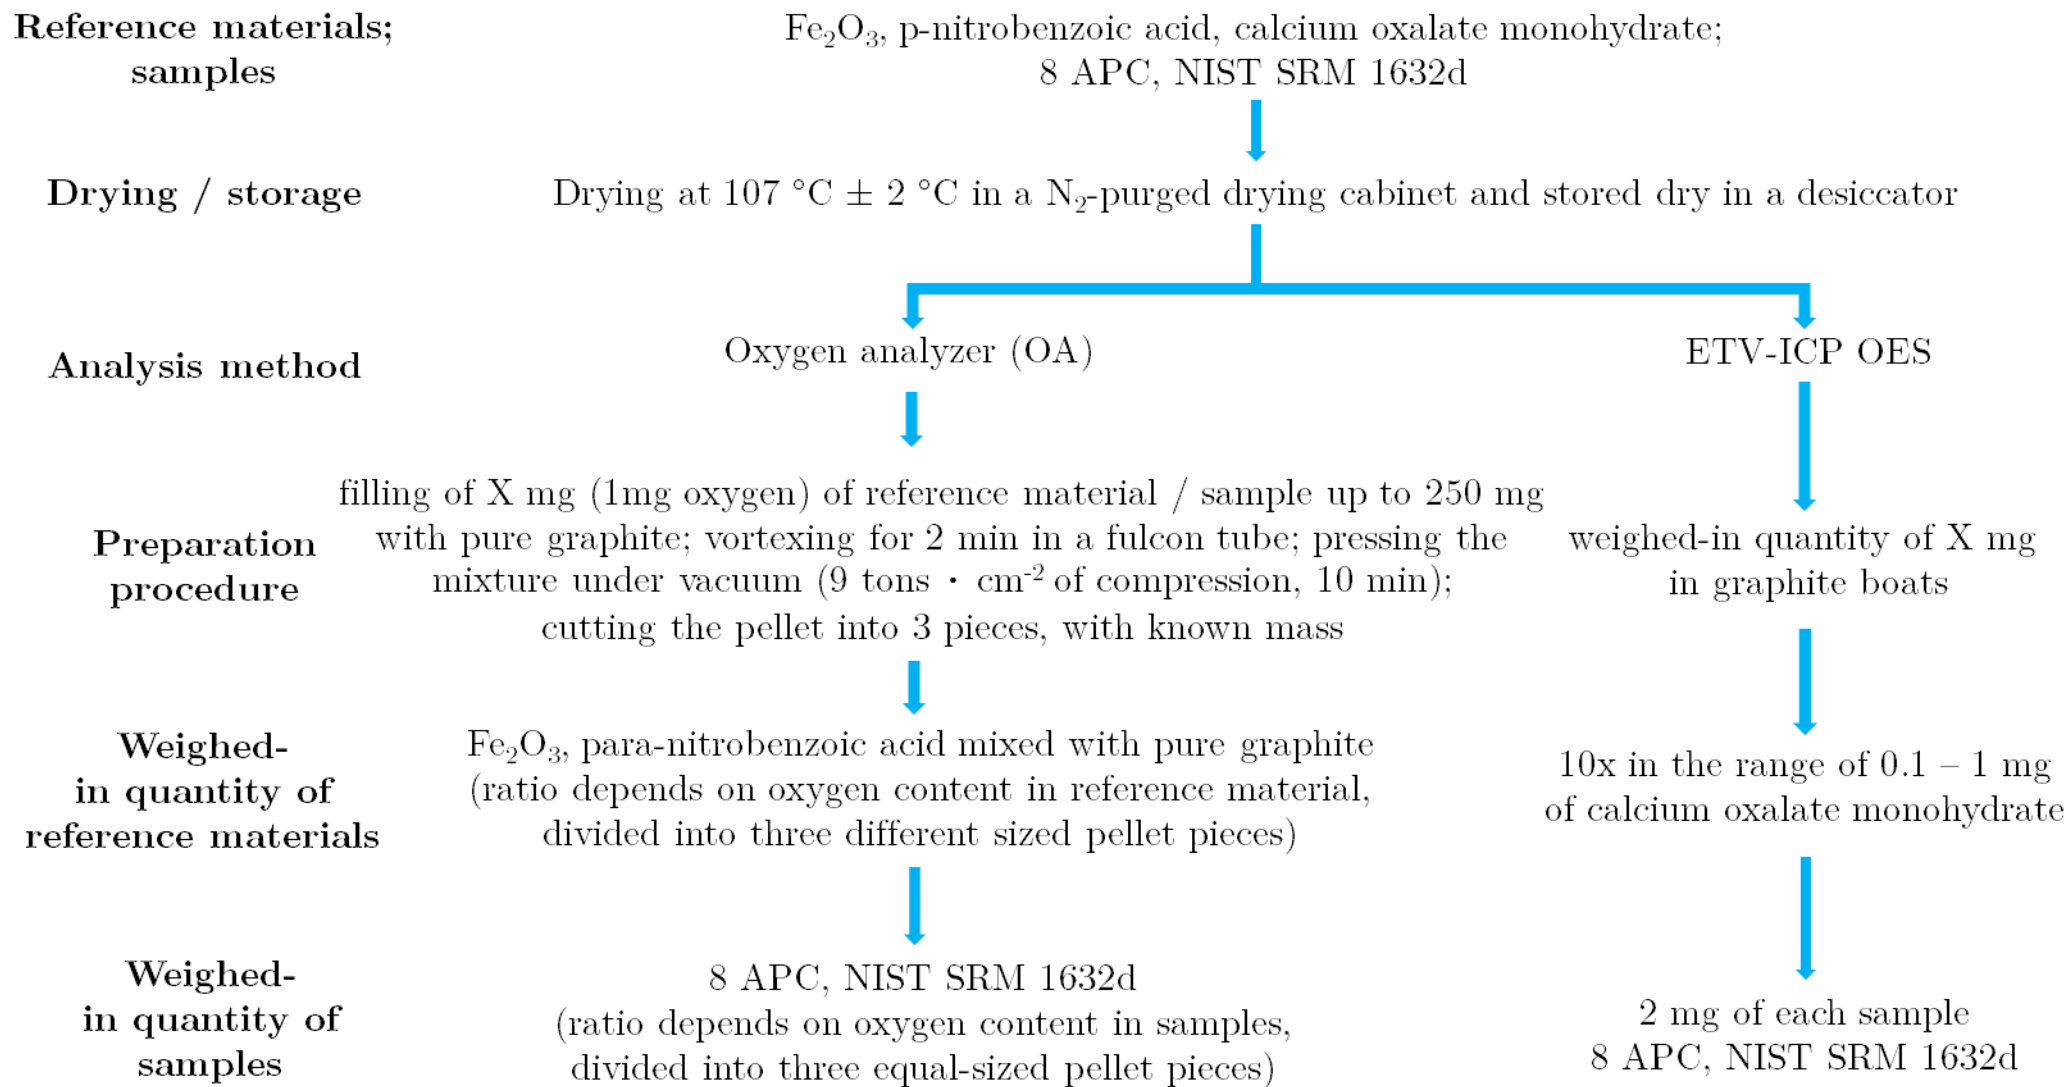

Figure S-1. Overview of the sample preparation

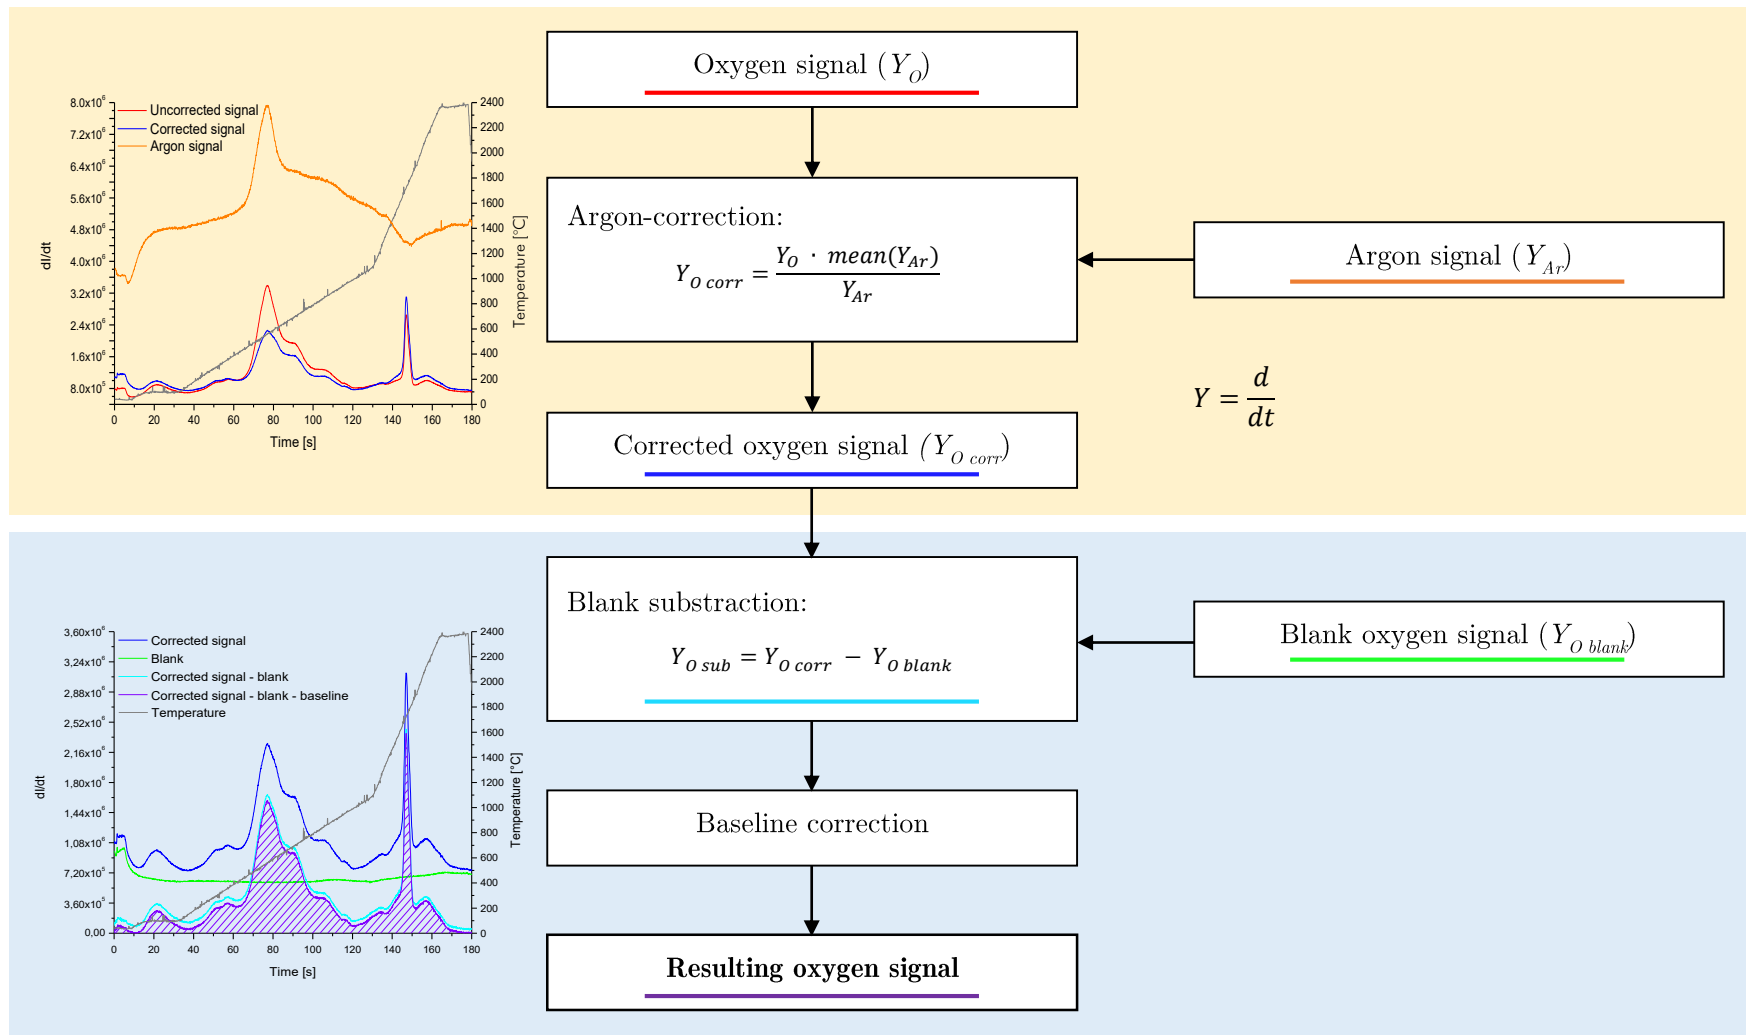

Figure S-2. Scheme of data processing and correction of the oxygen signal

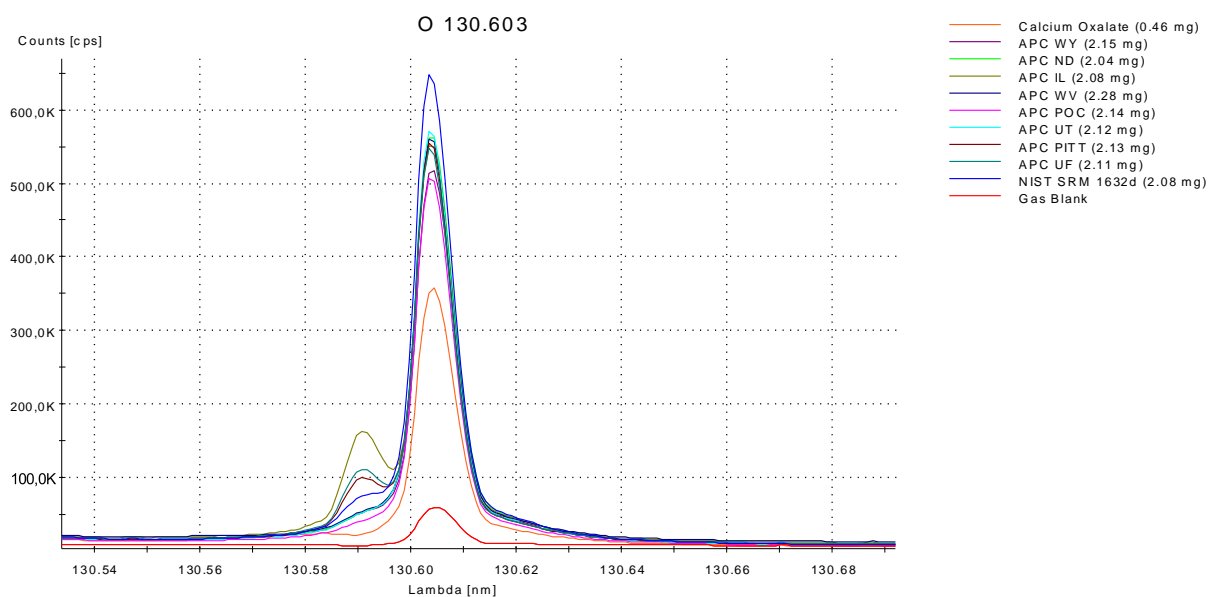

Figure S-3. Excerpt of the full spectra (130.5 – 130.7 nm) from the gas blank, all eight APC, NIST SRM 1632d and the calibration material calcium oxalate monohydrate

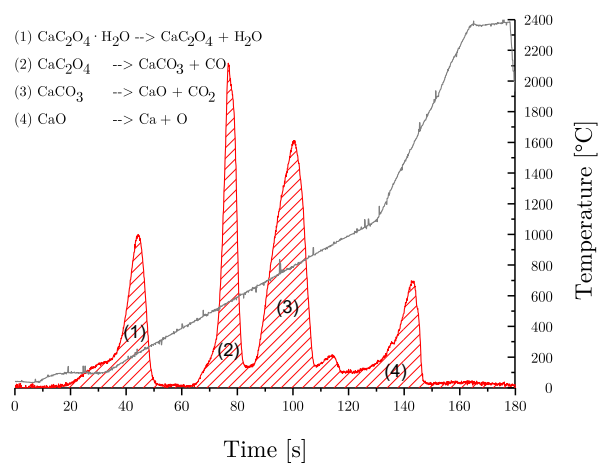

Figure S-4. Detailed explanation of the stepwise decomposition process of calcium oxalate monohydrate by means of ETV-ICP OES – oxygen release (red line); temperature profile (black line)

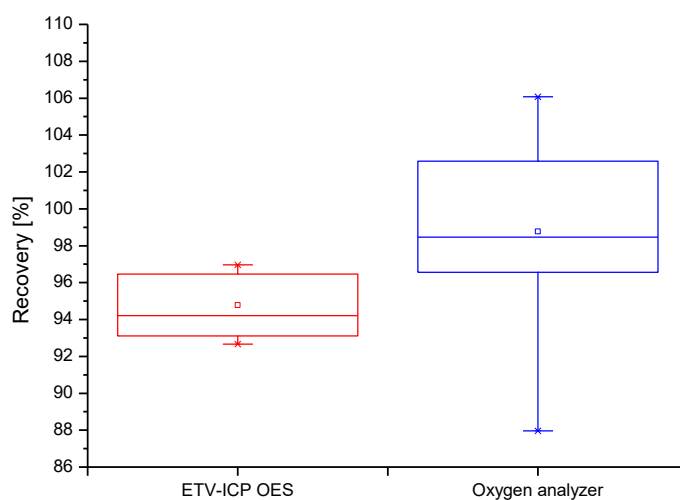

Figure S-5. Box-and-Whisker plots of recovery of oxygen from APC and NIST SRM 1632d for both analysis techniques

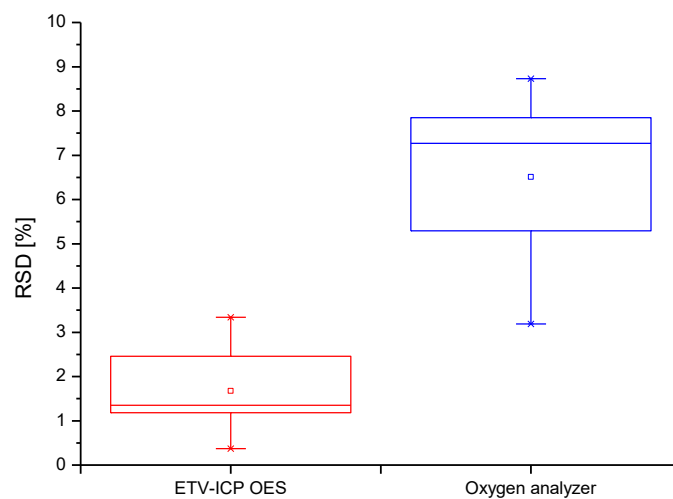

Figure S-6. Box-and-Whisker plots of RSD's of oxygen from all APC and NIST SRM 1632d for both analysis techniques
